# Supplementary material for: Ferroptosis Related Immunomodulatory Effect of a Novel Extracellular Polysaccharides from Marine Fungus Aureobasidium melanogenum
Source: MDPI journal article supplement (doi:10.3390/md20050332), 2022-05-19
Supplement: s1 [file s1]

## Supplementary Table S2

### The details of 102 significant DAMs (Positive and negative models)

| Name                                                               | VIP           | Fold change   | p-value       |
|--------------------------------------------------------------------|---------------|---------------|---------------|
| Aspartic acid                                                      | 3.8823        | 0.2648        | <0.001        |
| Pi 38:3                                                            | 4.7552        | 0.5183        | <0.001        |
| Pseudouridine                                                      | 8.4153        | 0.4298        | <0.001        |
| Glutamic acid                                                      | 3.2771        | 0.6450        | 0.0002        |
| Adenylosuccinic acid                                               | 1.1468        | 0.4843        | 0.0002        |
| Geranyl diphosphate                                                | 2.7274        | 0.2343        | 0.0002        |
| Malate                                                             | 3.4694        | 0.5156        | 0.0003        |
| Thymidine                                                          | 2.3622        | 0.5302        | 0.0007        |
| Eicosenoic acid                                                    | 3.5517        | 0.6212        | 0.0009        |
| Pantothenate                                                       | 4.6157        | 0.7221        | 0.0013        |
| Trehalose                                                          | 1.3501        | 0.6040        | 0.0014        |
| Pi 38:4                                                            | 5.4099        | 0.5709        | 0.0014        |
| Udp-galactose                                                      | 7.5115        | 0.5585        | 0.0015        |
| Coenzyme a                                                         | 1.3075        | 0.5850        | 0.0015        |
| Pantothenic acid                                                   | 3.0371        | 0.5973        | 0.0017        |
| 5,8,11,14-eicosatetraenoic acid, 16-hydroxy-, (5z,8z,11z,14z,16r)- | 3.4126        | 0.6508        | 0.0018        |
| <b>Citraconic acid</b>                                             | <b>5.8519</b> | <b>1.6817</b> | <b>0.0018</b> |
| D-turanose                                                         | 1.1070        | 0.5924        | 0.0023        |
| Orotidine                                                          | 1.6813        | 0.5409        | 0.0029        |
| His-ser                                                            | 2.9599        | 0.4502        | 0.0029        |
| L-Malic acid                                                       | 2.7054        | 0.3377        | 0.0048        |
| Myo-inositol                                                       | 2.8573        | 0.5869        | 0.0065        |
| Pi 40:5                                                            | 1.9402        | 0.7107        | 0.0066        |
| Uridine 5'-monophosphate                                           | 5.7428        | 0.5691        | 0.0072        |
| Pc 36:2                                                            | 2.2439        | 0.8491        | 0.0073        |
| Undecanoic acid                                                    | 1.3103        | 0.7411        | 0.0075        |
| <b>L-citrulline</b>                                                | <b>1.5105</b> | <b>1.6158</b> | <b>0.0088</b> |
| Pi 38:5                                                            | 3.4335        | 0.6193        | 0.0095        |
| <b>Indolelactic acid</b>                                           | <b>2.8777</b> | <b>1.3306</b> | <b>0.0099</b> |
| Pi 39:4                                                            | 1.0285        | 0.6654        | 0.0103        |
| <b>1,2-dipalmitoyl-sn-glycero-3-phosphoethanolamine</b>            | <b>2.4122</b> | <b>1.9225</b> | <b>0.0125</b> |
| Oxypurinol                                                         | 3.2597        | 0.6543        | 0.0127        |
| Inosine                                                            | 2.9035        | 0.6666        | 0.0145        |
| Cytidine monophosphate n-acetylneuraminic acid                     | 2.5036        | 0.7345        | 0.0155        |

|                                            |         |         |        |
|--------------------------------------------|---------|---------|--------|
| N-(phosphonomethyl)glycine                 | 2.7476  | 0.7936  | 0.0181 |
| Oleic acid                                 | 10.1207 | 0.7167  | 0.0220 |
| Pi 36:3                                    | 2.4928  | 0.7154  | 0.0222 |
| Cytidine 5'-diphosphocholine (CDP-choline) | 1.3462  | 0.7719  | 0.0230 |
| 1-Stearoyl-sn-glycerol 3-phosphocholine    | 1.1206  | 1.3432  | 0.0277 |
| 4.alpha.-mannobiose                        | 1.8954  | 39.1696 | 0.0284 |
| Citrate                                    | 2.3145  | 0.4492  | 0.0349 |
| Pg 36:3                                    | 6.5624  | 0.7360  | 0.0366 |
| Pyruvate                                   | 1.7049  | 0.7261  | 0.0400 |
| Inosine 5'-monophosphate                   | 1.7102  | 0.7718  | 0.0420 |
| Adenosine 5'-phosphosulfate                | 3.9118  | 0.5741  | 0.0423 |
| Orotate                                    | 1.1007  | 0.2993  | 0.0426 |
| Tridecanoic acid (Tridecylic acid)         | 1.0364  | 0.8608  | 0.0430 |
| Cis-9-palmitoleic acid                     | 3.1584  | 0.7676  | 0.0474 |
| Erucic acid                                | 1.6224  | 0.8124  | 0.0476 |
| G-guanidinobutyrate                        | 5.4118  | 0.5681  | 0.0000 |
| Adenylosuccinate                           | 1.1996  | 0.3993  | 0.0000 |
| Hypoxanthine                               | 15.2589 | 0.5072  | 0.0001 |
| 2-Ethoxyethanol                            | 1.5682  | 0.6646  | 0.0001 |
| D-pyroglutamic acid                        | 2.1780  | 0.5781  | 0.0001 |
| N-acetylputrescine                         | 1.1322  | 2.4538  | 0.0002 |
| 5-aminovaleric acid betaine                | 1.6404  | 0.6153  | 0.0003 |
| (2r)-3-hydroxyisovaleroylcarnitine         | 1.0762  | 0.5040  | 0.0004 |
| Uridine 5'-diphosphate                     | 2.9849  | 0.6643  | 0.0004 |
| 5-L-Glutamyl-L-alanine                     | 1.7223  | 0.4231  | 0.0004 |
| Ophthalmate                                | 1.2846  | 0.4692  | 0.0005 |
| Pyridoxal                                  | 1.3448  | 0.5449  | 0.0005 |
| Coenzyme a (coa)                           | 1.5454  | 0.5392  | 0.0006 |
| Arg-Trp                                    | 1.2697  | 0.4400  | 0.0006 |
| UDP-D-Galactose                            | 2.9627  | 0.6718  | 0.0007 |
| Chromone-3-carboxylic acid                 | 1.0005  | 0.5724  | 0.0008 |
| L-propionylcarnitine                       | 5.1156  | 0.3717  | 0.0011 |
| Cytidine                                   | 6.8474  | 0.4408  | 0.0012 |
| Uracil                                     | 4.2691  | 0.3988  | 0.0012 |

|                                                                          |         |        |        |
|--------------------------------------------------------------------------|---------|--------|--------|
| Melibiose                                                                | 1.3090  | 0.5783 | 0.0021 |
| Carnitine                                                                | 10.5092 | 0.5142 | 0.0028 |
| NADH                                                                     | 1.3381  | 0.4547 | 0.0030 |
| N-octadecylamine                                                         | 2.0898  | 0.2753 | 0.0039 |
| Uridine                                                                  | 1.5552  | 0.4632 | 0.0043 |
| Lactose                                                                  | 1.4493  | 0.6600 | 0.0051 |
| 2-methylbutyryl-l-carnitine                                              | 3.2970  | 0.5934 | 0.0059 |
| Cytidine 5'-<br>diphosphocholine                                         | 3.6007  | 0.7160 | 0.0071 |
| Adenosine                                                                | 3.2089  | 0.3644 | 0.0079 |
| 1-stearoyl-2-arachidonoyl-<br>sn-glycero-3-phospho-(1'-<br>myo-inositol) | 1.2205  | 0.6641 | 0.0091 |
| S-adenosyl-l-homocysteine                                                | 1.4229  | 0.5302 | 0.0096 |
| 1-palmitoyl-2-hydroxy-sn-<br>glycero-3-<br>phosphoethanolamine           | 1.4861  | 1.8014 | 0.0126 |
| .beta.-nicotinamide<br>adenine dinucleotide<br>phosphate                 | 2.6863  | 0.6745 | 0.0137 |
| Adenosine 5'-<br>monophosphate                                           | 5.8866  | 0.5662 | 0.0152 |
| Cysteinylglycine                                                         | 2.8585  | 0.6569 | 0.0156 |
| Amcinonide                                                               | 1.2350  | 0.3170 | 0.0166 |
| 1,3-dicyclohexylurea                                                     | 2.4729  | 0.8261 | 0.0177 |
| Udp-n-acetylglucosamine                                                  | 6.0559  | 0.7916 | 0.0196 |
| L-glutathione, reduced                                                   | 11.9487 | 0.6449 | 0.0210 |
| Thymine                                                                  | 1.6029  | 0.5165 | 0.0213 |
| Adenosine 2'-<br>monophosphate                                           | 1.1577  | 0.3950 | 0.0236 |
| .beta.-nicotinamide<br>adenine<br>dinucleotide(NAD)                      | 3.6070  | 0.7796 | 0.0250 |
| 1-palmitoyl-sn-glycero-3-<br>phosphocholine                              | 5.3335  | 1.4942 | 0.0299 |
| Cytidine 5'-triphosphate                                                 | 2.3235  | 0.6112 | 0.0310 |
| Phosphocreatine                                                          | 1.8885  | 0.5111 | 0.0341 |
| Uridine 5'-triphosphate                                                  | 2.5685  | 0.6434 | 0.0358 |
| 1-stearoyl-2-hydroxy-sn-<br>glycero-3-<br>phosphoethanolamine            | 1.8646  | 1.5997 | 0.0363 |
| Adenosine 5'-triphosphate<br>(atp)                                       | 5.1222  | 0.6063 | 0.0386 |

|                                     |        |        |        |
|-------------------------------------|--------|--------|--------|
| Uridine 5'-triphosphate (UTP)       | 1.7557 | 0.6505 | 0.0400 |
| 5-(2-hydroxyethyl)-4-methylthiazole | 1.5758 | 1.8515 | 0.0410 |
| Bendiocarb                          | 1.0809 | 0.7118 | 0.0427 |
| Thiamine                            | 2.7538 | 1.9121 | 0.0446 |
| Glutathione, oxidized               | 3.6410 | 0.7163 | 0.0448 |
| Cytosine                            | 5.5860 | 0.5249 | 0.0464 |

**Note: 12 up-regulated metabolites were colored in red.**
