# Supplementary material for: Ferroptosis Related Immunomodulatory Effect of a Novel Extracellular Polysaccharides from Marine Fungus Aureobasidium melanogenum
Source: MDPI journal article supplement (doi:10.3390/md20050332), 2022-05-19
Supplement: s1 [file s1]

## Supplementary Table S3

### 48 KEGG pathways from metabolites data

| Number | Map_ID   | Map_Name                                    | p-value     | FDR         |
|--------|----------|---------------------------------------------|-------------|-------------|
| 1      | mmu00240 | Pyrimidine metabolism                       | 1.86489E-11 | 2.20057E-09 |
| 2      | mmu02010 | ABC transporters                            | 1.77494E-06 | 0.000104721 |
| 3      | mmu04742 | Taste transduction                          | 1.07816E-05 | 0.000424074 |
| 4      | mmu00480 | Glutathione metabolism                      | 3.03708E-05 | 0.000895939 |
| 5      | mmu00250 | Alanine, aspartate and glutamate metabolism | 7.92752E-05 | 0.001870895 |
| 6      | mmu00770 | Pantothenate and CoA biosynthesis           | 0.000112029 | 0.002203245 |
| 7      | mmu00230 | Purine metabolism                           | 0.000146306 | 0.002466295 |
| 8      | mmu04080 | Neuroactive ligand-receptor interaction     | 0.000186587 | 0.002752161 |
| 9      | mmu05230 | Central carbon metabolism in cancer         | 0.000313192 | 0.004106301 |
| 10     | mmu04977 | Vitamin digestion and absorption            | 0.000403194 | 0.004343012 |
| 11     | mmu04925 | Aldosterone synthesis and secretion         | 0.000404857 | 0.004343012 |
| 12     | mmu04714 | Thermogenesis                               | 0.000483996 | 0.004759295 |
| 13     | mmu04216 | Ferroptosis                                 | 0.001204406 | 0.010932303 |
| 14     | mmu00730 | Thiamine metabolism                         | 0.001556256 | 0.013117019 |
| 15     | mmu00190 | Oxidative phosphorylation                   | 0.002095445 | 0.016484164 |
| 16     | mmu04924 | Renin secretion                             | 0.002514418 | 0.018224423 |
| 17     | mmu04068 | FoxO signaling pathway                      | 0.002625552 | 0.018224423 |
| 18     | mmu00270 | Cysteine and methionine metabolism          | 0.003620044 | 0.023731396 |
| 19     | mmu04930 | Type II diabetes mellitus                   | 0.003896172 | 0.024000858 |
| 20     | mmu00020 | Citrate cycle (TCA cycle)                   | 0.004067942 | 0.024000858 |
| 21     | mmu05012 | Parkinson disease                           | 0.004690029 | 0.025155611 |
| 22     | mmu04918 | Thyroid hormone synthesis                   | 0.004690029 | 0.025155611 |
| 23     | mmu04152 | AMPK signaling pathway                      | 0.005366635 | 0.027533173 |
| 24     | mmu00220 | Arginine biosynthesis                       | 0.006099031 | 0.029986904 |
| 25     | mmu00052 | Galactose metabolism                        | 0.006697661 | 0.031109444 |
| 26     | mmu05032 | Morphine addiction                          | 0.007118263 | 0.031109444 |
| 27     | mmu04211 | Longevity regulating pathway                | 0.007118263 | 0.031109444 |
| 28     | mmu04922 | Glucagon signaling pathway                  | 0.008642103 | 0.03642029  |
| 29     | mmu00330 | Arginine and proline                        | 0.008981231 | 0.036544318 |

| metabolism |          |                                         |             |             |
|------------|----------|-----------------------------------------|-------------|-------------|
| 30         | mmu01100 | Metabolic pathways                      | 0.010797494 | 0.041290701 |
| 31         | mmu05034 | Alcoholism                              | 0.011197478 | 0.041290701 |
| 32         | mmu04022 | cGMP-PKG signaling pathway              | 0.011197478 | 0.041290701 |
| 33         | mmu00760 | Nicotinate and nicotinamide metabolism  | 0.012522819 | 0.044778566 |
| 34         | mmu04020 | Calcium signaling pathway               | 0.013540191 | 0.046992427 |
| 35         | mmu00410 | beta-Alanine metabolism                 | 0.01536141  | 0.051268004 |
| 36         | mmu04721 | Synaptic vesicle cycle                  | 0.016075561 | 0.051268004 |
| 37         | mmu04911 | Insulin secretion                       | 0.016075561 | 0.051268004 |
| 38         | mmu01230 | Biosynthesis of amino acids             | 0.018555058 | 0.055450392 |
| 39         | mmu00630 | Glyoxylate and dicarboxylate metabolism | 0.018789082 | 0.055450392 |
| 40         | mmu00471 | D-Glutamine and D-glutamate metabolism  | 0.018796743 | 0.055450392 |
| 41         | mmu04923 | Regulation of lipolysis in adipocytes   | 0.021697063 | 0.062445207 |
| 42         | mmu04066 | HIF-1 signaling pathway                 | 0.02477001  | 0.069591933 |
| 43         | mmu04964 | Proximal tubule bicarbonate reclamation | 0.031408542 | 0.084232    |
| 44         | mmu01523 | Antifolate resistance                   | 0.031408542 | 0.084232    |
| 45         | mmu04931 | Insulin resistance                      | 0.038663417 | 0.101384072 |
| 46         | mmu01200 | Carbon metabolism                       | 0.039610007 | 0.10160828  |
| 47         | mmu05211 | Renal cell carcinoma                    | 0.048950411 | 0.120336428 |
| 48         | mmu05410 | Hypertrophic cardiomyopathy (HCM)       | 0.048950411 | 0.120336428 |

Note: Top 20 KEGG pathways were colored in red.
