# Supplementary material for: Ferroptosis Related Immunomodulatory Effect of a Novel Extracellular Polysaccharides from Marine Fungus Aureobasidium melanogenum
Source: MDPI journal article supplement (doi:10.3390/md20050332), 2022-05-19

Supplementary Table S1: EI-MS spectra of the methylated sugars

Methylation analysis of AUM-1

| Retention time (min) | Methylated sugars | Molar ratios (%) | Mass fragments (m/z)                | Linkage type |
|----------------------|-------------------|------------------|-------------------------------------|--------------|
| 16.330               | 2,3,4,6-Me4-Glcp  | 10.98            | 43, 101, 117, 129, 145, 161, 205    | Glcp-1       |
| 20.630               | 3,4,6-Me3-Manp    | 3.08             | 43, 87, 99, 101, 129, 161, 189      | Manp-1-2     |
| 20.864               | 3,4,6-Me3-Glcp    | 2.75             | 43, 87, 99, 117, 129, 161, 189      | Glcp-1-2     |
| 21.270               | 2,3,6-Me3-Glcp    | 61.96            | 43, 87, 99, 117, 129, 161, 173, 233 | Glcp-1-4     |
| 22.724               | 2,3,4-Me3-Glcp    | 4.82             | 43, 99, 117, 129, 161, 189, 233     | Glcp-1-6     |
| 27.453               | 2,3-Me2-Glcp      | 16.42            | 43, 99, 117, 159, 201, 261          | Glcp-1-4-6   |

EI-MS spectra of the methylated sugars

A: 2,3,4,6-Me4-Glcp

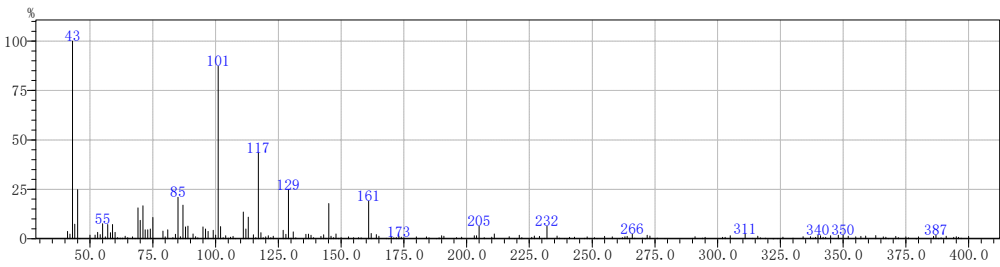

B: 3,4,6-Me3-Manp

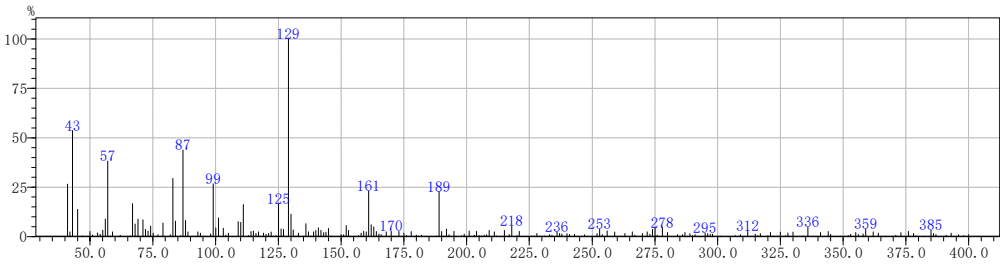

C: 3,4,6-Me3-Glcp

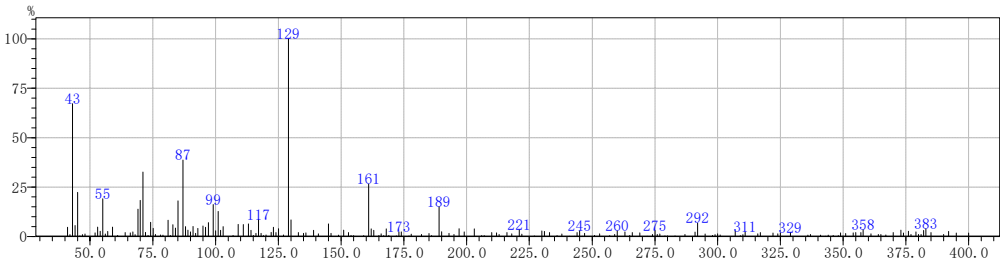

D: 2,3,6-Me3-Glcp

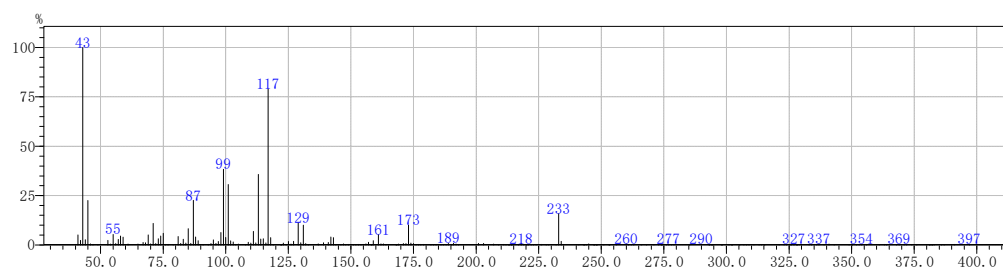

E: 2,3,4-Me<sub>3</sub>-Glcp

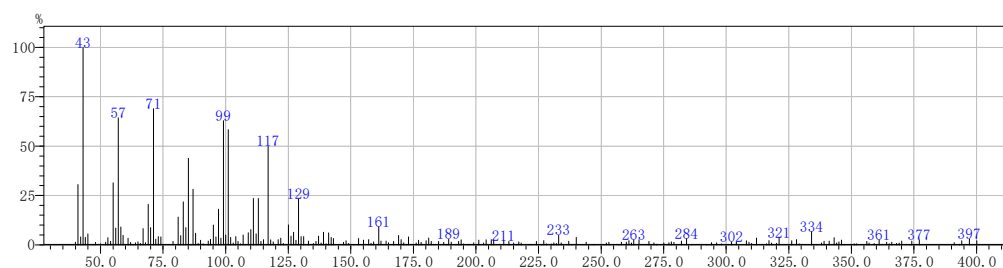

F: 2,3-Me<sub>2</sub>-Glcp

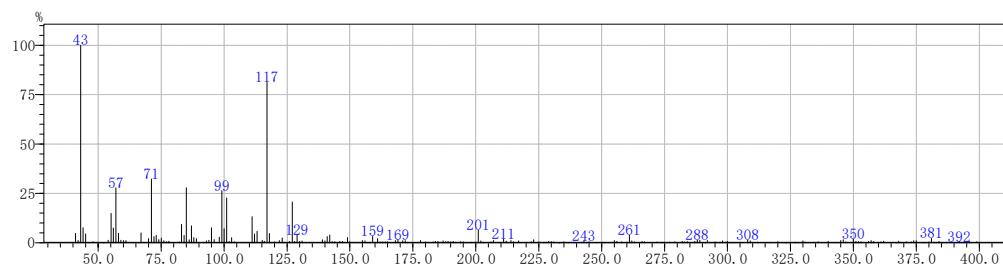

Supplement: s1 [file s1]
